# Supplementary material for: Integrating 400 million variants from 80,000 human samples with extensive annotations: towards a knowledge base to analyze disease cohorts
Source: Springer Nature journal article supplement (doi:10.1186/s12859-015-0865-9), 2016-01-08
Supplement: 12859_2015_865_MOESM1_ESM.pdf [file 12859_2015_865_MOESM1_ESM.pdf]

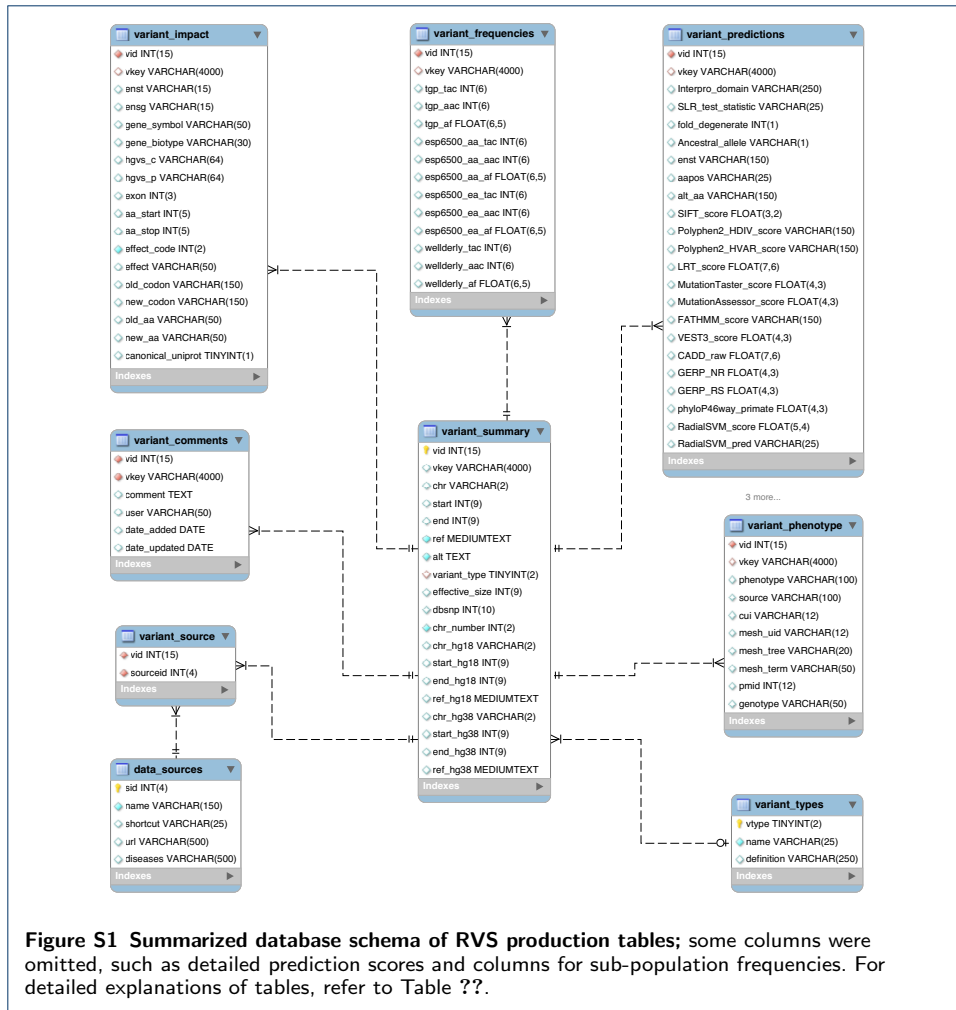

**Figure S1 Summarized database schema of RVS production tables;** some columns were omitted, such as detailed prediction scores and columns for sub-population frequencies. For detailed explanations of tables, refer to Table ??.
