# Supplementary material for: Integrating 400 million variants from 80,000 human samples with extensive annotations: towards a knowledge base to analyze disease cohorts
Source: Springer Nature journal article supplement (doi:10.1186/s12859-015-0865-9), 2016-01-08
Supplement: 12859_2015_865_MOESM2_ESM.pdf [file 12859_2015_865_MOESM2_ESM.pdf]

**Table S1** Effects of observed variants. Shown are the numbers of variants that fall into a specific category of the SequenceOntology (<http://www.sequenceontology.org/>), as determined by snpEff [?]. Counts are based on observations in studies with  $\geq 500$  samples, unfiltered, and take into account one canonical transcript per variant. Regions up/downstream of a gene are limited to 5000bp. Counts for intergenic regions are not shown in this table. Effects with less than 10 matching variants are omitted. '+' indicates that a variant falls into multiple categories, such as an inframe deletion that leads to the loss of a stop codon.

| Effect                           | Count       | Effect                                        | Count |
|----------------------------------|-------------|-----------------------------------------------|-------|
| intron_variant                   | 103,440,930 | frameshift_variant+missense                   | 999   |
| downstream_gene_variant          | 10,171,427  | stop_lost                                     | 740   |
| upstream_gene_variant            | 9,346,371   | exon_loss_variant                             | 695   |
| 3'UTR_variant                    | 3,368,125   | stop_gained+inframe_insertion                 | 474   |
| synonymous                       | 2,292,056   | stop_gained+disruptive_inframe_deletion       | 332   |
| frameshift                       | 1,385,311   | stop_gained+disruptive_inframe_insertion      | 309   |
| 5'UTR_variant                    | 1,056,181   | frameshift_variant+synonymous                 | 219   |
| missense_variant                 | 802,216     | initiator_codon_variant                       | 176   |
| splice_region_variant            | 518,745     | missense_variant+inframe_deletion             | 149   |
| 5'UTR_premature_start_codon_gain | 180,894     | stop_lost+inframe_deletion                    | 134   |
| non_coding_exon_variant          | 163,722     | missense_variant+disruptive_inframe_deletion  | 104   |
| inframe_deletion                 | 23,257      | start_lost+inframe_deletion                   | 69    |
| splice_acceptor_variant          | 22,903      | exon_loss_variant+synonymous_variant          | 44    |
| splice_donor_variant             | 21,675      | frameshift_variant+stop_gained+missense       | 42    |
| stop_gained                      | 20,495      | exon_loss_variant+start_lost+synonymous       | 41    |
| disruptive_inframe_deletion      | 16,857      | stop_lost+disruptive_inframe_deletion         | 24    |
| inframe_insertion                | 13,387      | missense_variant+inframe_insertion            | 23    |
| frameshift_variant+stop_gained   | 9,007       | missense_variant+disruptive_inframe_insertion | 19    |
| disruptive_inframe_insertion     | 6,060       | exon_loss_variant+stop_lost+synonymous        | 18    |
| stop_retained_variant            | 2,068       | start_lost+disruptive_inframe_insertion       | 13    |
| frameshift_variant+stop_lost     | 1,820       | start_lost+inframe_insertion                  | 12    |
| start_lost                       | 1,446       | start_lost+disruptive_inframe_deletion        | 11    |
| frameshift_variant+start_lost    | 1,230       | stop_gained+inframe_deletion                  | 10    |
