# Supplementary material for: Integrating 400 million variants from 80,000 human samples with extensive annotations: towards a knowledge base to analyze disease cohorts
Source: Springer Nature journal article supplement (doi:10.1186/s12859-015-0865-9), 2016-01-08
Supplement: 12859_2015_865_MOESM3_ESM.pdf [file 12859_2015_865_MOESM3_ESM.pdf]

**Table S2 Samples in RVS by sequencing/genotyping technology. Approximate number of base pairs covered. \*Targeted regions in whole exome sequencing depend largely on the capturing kit, see [?] for an overview.**

| Technology              | Samples in RVS | Base pairs    |
|-------------------------|----------------|---------------|
| Whole genome sequencing | 5,612          | >3 billion    |
| Whole exome sequencing* | 65,736         | 51-64 million |
| Genotyping              | 11,210         | <1 million    |
