# Supplementary material for: Integrating 400 million variants from 80,000 human samples with extensive annotations: towards a knowledge base to analyze disease cohorts
Source: Springer Nature journal article supplement (doi:10.1186/s12859-015-0865-9), 2016-01-08
Supplement: 12859_2015_865_MOESM4_ESM.pdf [file 12859_2015_865_MOESM4_ESM.pdf]

**Table S3 Details on major external resources integrated into RVS. \*TCGA uses self-reported ethnicities.**

| Study        | Version               | Samples | Ethnicities                                                                                         | Reference |
|--------------|-----------------------|---------|-----------------------------------------------------------------------------------------------------|-----------|
| 1000 Genomes | Phase 3, v5.20130502  | 2,504   | Five major groups: African, Ad Mixed American, East Asian, South Asian, European; 26 subpopulations | [?]       |
| ESP6500      | V2 SSA137 (dbSNP 138) | 6,503   | African American, European American                                                                 | [?]       |
| ExAC         | Release 0.3           | 63,352  | African/African American, American, East Asian, Finnish, Non-Finnish Europeans, South Asian         | [?]       |
| TCGA*        |                       | 4,224   | African, American Indian, Asian, Hispanic/Latino, Native Hawaiian, White                            | [?]       |
| dbNSFP       | v2.5                  | —       | —                                                                                                   | [?]       |
| ClinVar      | Release 2015-02-03    | —       | —                                                                                                   | [?]       |
| COSMIC       | v71 10-21-14          | —       | —                                                                                                   | [?]       |
| SwissVar     | Downloaded: 2015/03   | —       | —                                                                                                   | [?]       |
| HGMD         | 2015.1                | —       | —                                                                                                   | [?]       |
| ENSEMBL      | v78                   | —       | —                                                                                                   | [?]       |
| RefSeq       | Release 68            | —       | —                                                                                                   | [?]       |
